# Supplementary material for: C6 Ceramide Inhibits Canine Mammary Cancer Growth and Metastasis by Targeting EGR3 through JAK1/STAT3 Signaling
Source: MDPI journal article supplement (doi:10.3390/ani14030422), 2024-01-27

Figure5A

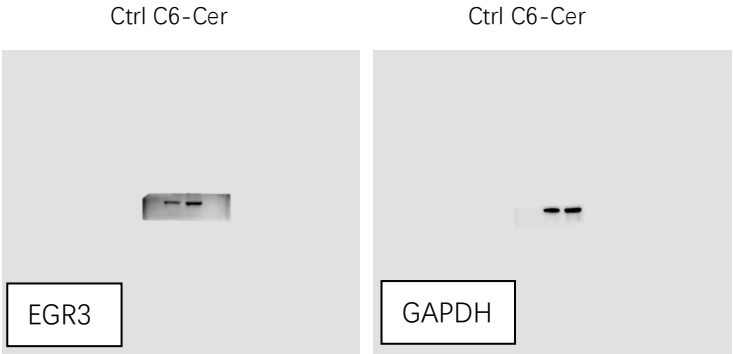

Marker Ctrl C6-Cer C6-Cer

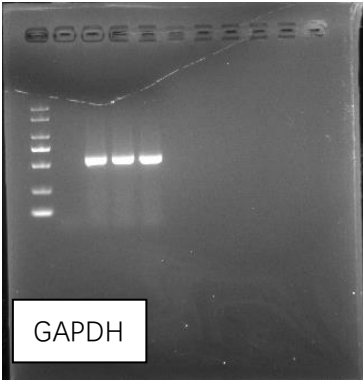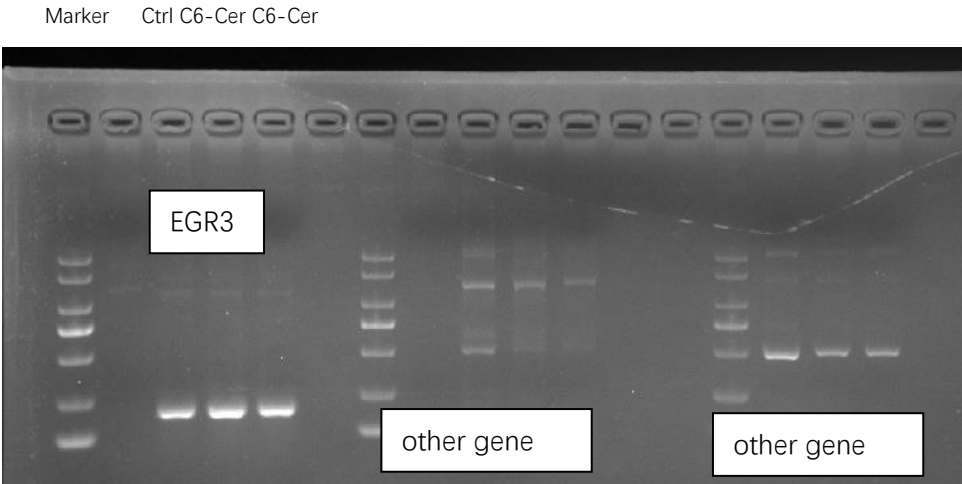

Figure5D

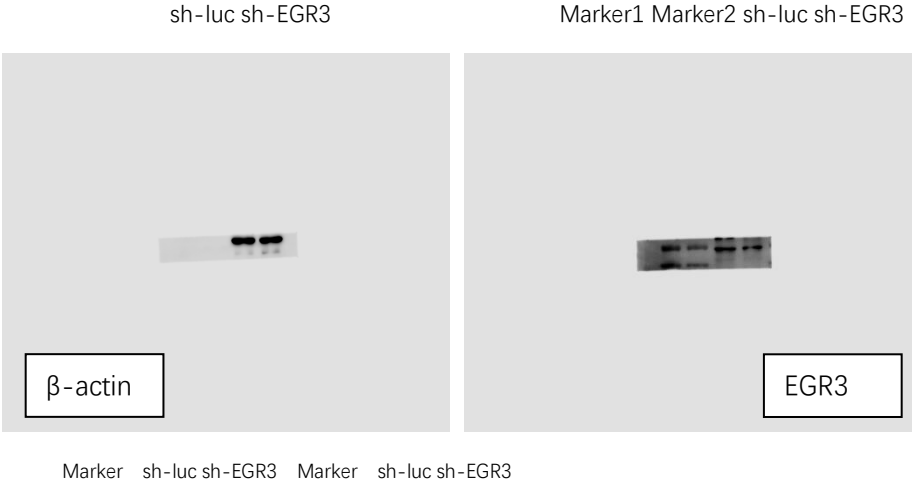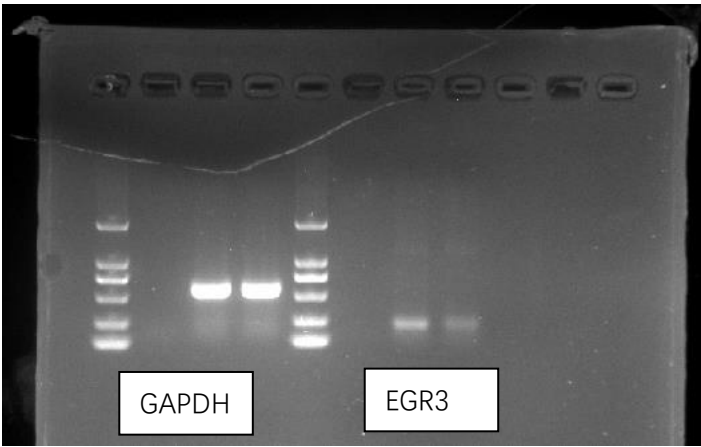

Figure 5K

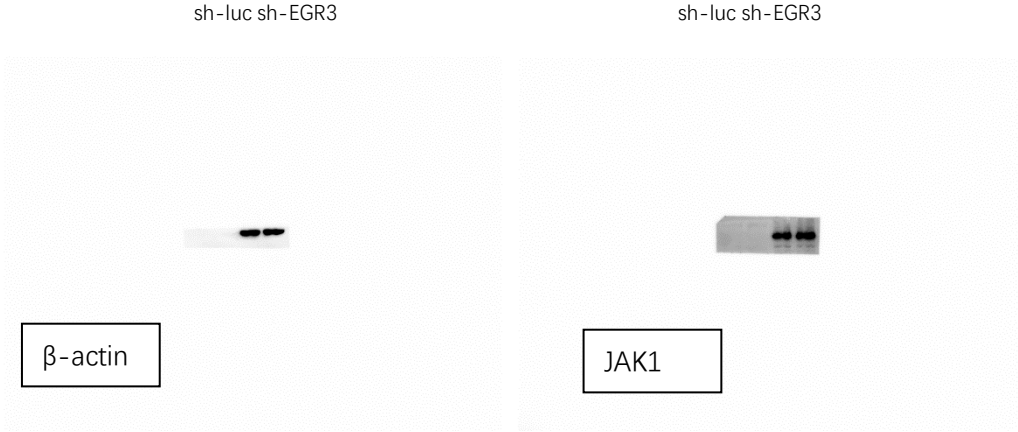

sh-luc sh-EGR3

pJAK1

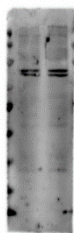

sh-luc sh-EGR3

pSTAT3

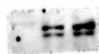

sh-luc sh-EGR3

STAT3

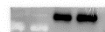

Supplement: s1 [file s1]
